# Supplementary material
Source: Springer Nature journal article supplement (https://www.springermedizin.de/resource/supplementary/12874_2014_1154_MOESM4_ESM.pdf/9433372)

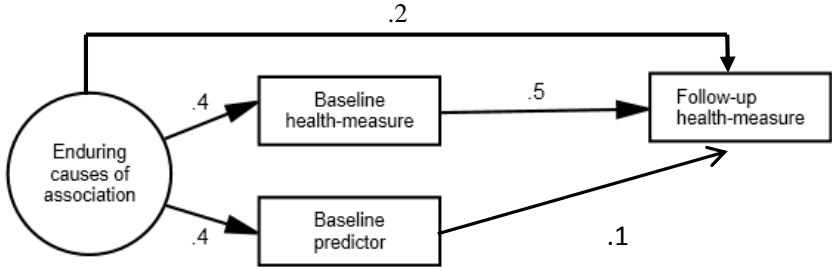

Supplement: MOESM4 [file 9433372]
